# Supplementary material for: Disease Control and Treatment Satisfaction in Patients with Chronic Spontaneous Urticaria in Japan
Source: MDPI journal article supplement (doi:10.3390/jcm13102967), 2024-05-17
Supplement: s1 [file s1]

## Disease control and treatment satisfaction in patients with chronic spontaneous urticaria in Japan

**Table S1.** Currently treated comorbidities in the study cohort

| Item, <sup>1</sup> n (%)            | Study cohort<br>(N = 529) |
|-------------------------------------|---------------------------|
| <b>Allergic conditions</b>          |                           |
| <i>Allergic rhinitis</i>            | 143 (27.0)                |
| <i>Atopic dermatitis</i>            | 95 (18.0)                 |
| <i>Allergic contact dermatitis</i>  | 58 (11.0)                 |
| <i>Allergic conjunctivitis</i>      | 47 (8.9)                  |
| <i>Bronchial asthma</i>             | 43 (8.1)                  |
| <i>Food allergy</i>                 | 42 (7.9)                  |
| <i>Chronic sinusitis</i>            | 40 (7.6)                  |
| <i>Drug allergy</i>                 | 13 (2.5)                  |
| <i>Eosinophilic esophagitis</i>     | 4 (0.8)                   |
| <i>Eosinophilic gastroenteritis</i> | 3 (0.6)                   |
| <b>Lifestyle-related diseases</b>   |                           |
| <i>Hypertension</i>                 | 84 (15.9)                 |
| <i>Hyperlipidemia</i>               | 50 (9.5)                  |
| <i>Diabetes</i>                     | 24 (4.5)                  |
| <i>Osteoporosis</i>                 | 12 (2.3)                  |
| <b>Psychological disorders</b>      |                           |
| <i>Insomnia</i>                     | 57 (10.8)                 |
| <i>Depression</i>                   | 44 (8.3)                  |
| <i>Anxiety</i>                      | 32 (6.0)                  |
| <b>Autoimmune disorders</b>         |                           |
| <i>Thyroid disease</i>              | 23 (4.3)                  |

|                                               |            |
|-----------------------------------------------|------------|
| <i>Alopecia areata</i>                        | 15 (2.8)   |
| <i>Rheumatoid arthritis</i>                   | 15 (2.8)   |
| <i>Ulcerative colitis</i>                     | 12 (2.3)   |
| <i>Other collagen diseases</i>                | 9 (1.7)    |
| <i>Crohn's disease</i>                        | 3 (0.6)    |
| <i>Not being treated for any of the above</i> | 209 (39.5) |

1—Patients could choose more than one response.

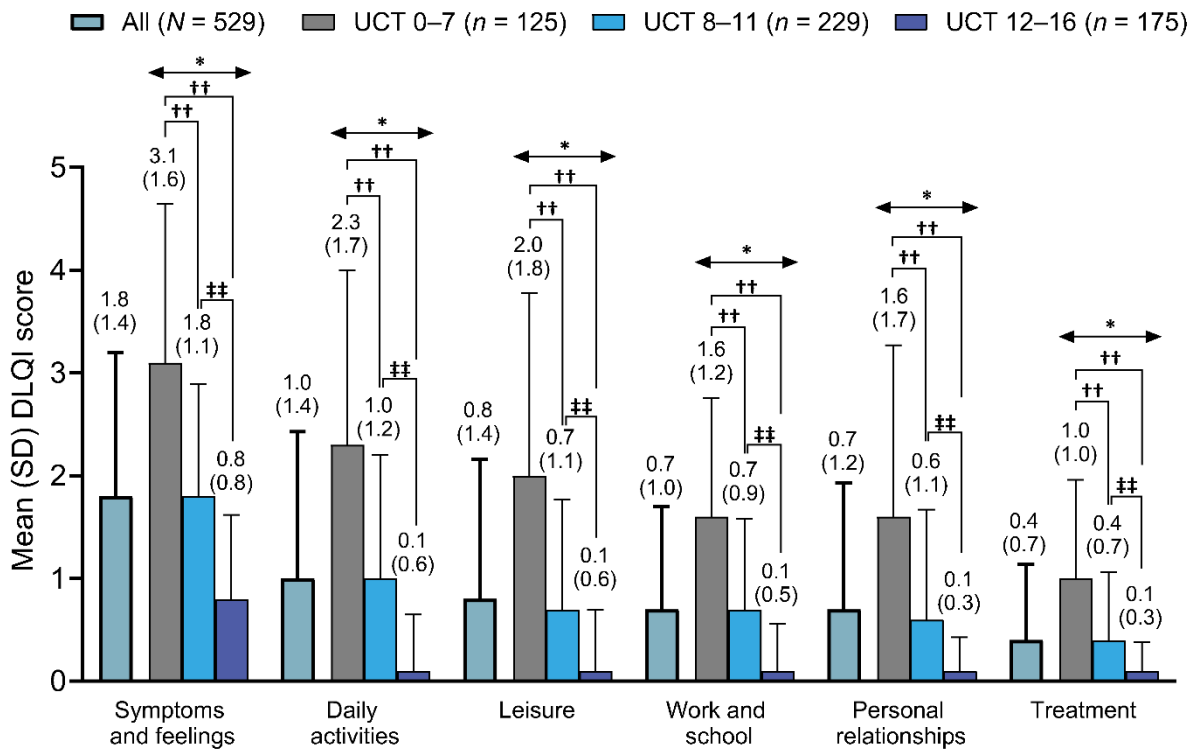

**Figure S1.** Summary of scores in all patients and in subgroups based on UCT for DLQI sub-item scores. \* $p < 0.01$  across UCT subgroups (Kruskal–Wallis test); †† $p < 0.01$  vs. UCT 0–7 subgroup (Steel–Dwass test); ‡‡ $p < 0.01$  vs. UCT 8–11 subgroup (Steel–Dwass test). Abbreviations: DLQI—Dermatology Life Quality Index; SD—standard deviation; UCT—Urticaria Control Test
